# Supplementary material
Source: PubMed Central journal article supplement (PMC3807501)

Table S1: Primers used in this study

| Oligonucleotide | Sequence, 5' to 3'            | gene product                                                                  |
|-----------------|-------------------------------|-------------------------------------------------------------------------------|
| rpoS_F          | CAAGCTAATTACTCACGAAGAAG       | BB_0771, rpoS: RNA polymerase sigma factor, coding region                     |
| rpoS 128R       | GTTTTTGGCTTTTGCATTGC          |                                                                               |
| rpoS-145F       | CAAAAAATACTCCCCCTAAAC         | BB_0771, rpoS: RNA polymerase sigma factor, long upstream untranslated region |
| rpoS-59R        | CATGCAAAAAGTGTGCCAATT         |                                                                               |
| rpoS 443F       | GATTCAACCTATCTCCTGCTCAG       | BB_0771, rpoS: RNA polymerase sigma factor, coding region                     |
| rpoS 705R       | GGTGCTTTTTTTGGGACTATTG        |                                                                               |
| ocpC-F          | GAAAGAGTTGAAGCTTGC            | BB_B19, OspC: Outer surface protein C, coding region                          |
| ospC-R          | ATTGCATAAGCTCCCGCTAA          |                                                                               |
| ospC-F4         | TGTTAAAGGGCCTAATCTTACAGAAATAA | BB_B19, OspC: Outer surface protein C, coding region                          |
| ospC-R4         | TACCAATAGCTTTGGTAGCAAGTTCAT   |                                                                               |
| ospA-F          | GCAGCCTTGACGAGAAAAAC          | BB_A15, Osp A: Outer surface protein A, coding region                         |
| ospA-R          | GCCTCAAGTACTCCAGATCC          |                                                                               |
| flaB-F          | TTTCAGGGTCTCAAGCGTCT          | BB_0147, flaB, coding region                                                  |
| flaB-R          | TGTTGAGCTCCTTCCTGTTG          |                                                                               |
| rpsO F          | TACTGGTTCTGTTGGGGTTCA         | BB_0804, rpsO, ribosomal protein S15, coding region                           |
| rpsO R          | TGGTAATACCGCAATAAACTTCG       |                                                                               |
| PNPase F        | TATGCAGCCGGTAAAATTCC          | BB 0805, polynucleotide nucleotidyl-transferase, coding region                |
| PNPase R        | AACTGCCGTAAAAGCAGCAT          |                                                                               |
| rpsO-PNPase F1  | AGGGCAAAGGCGAAGTTTAT          | Intergenic region between BB_0804 and BB_0805                                 |
| rpsO-PNPase R1  | GCCATAAATCCGGTCTCAAA          |                                                                               |
| S11BF_Snow      | CTTTAGCTTGGGCAAGTGCTGG        | BB_0501, rpsK, ribosomal protein S11, coding region                           |
| S11BR_Snow      | GCAGATTCACAGCCAATGCC          |                                                                               |
| S13AF_Snow      | GCAATAAATCAAGTATTTCTCC        | BB_0500, rpsM, ribosomal protein S13, coding region                           |
| S13AR_Snow      | TGCCTAACGCCCTATAACACG         |                                                                               |
| AlphaAF_Snow    | GCCAAGGTGATGGGTCTTATGG        | BB_0502, rpoA, DNA directed RNA polymerase, $\alpha$ subunit, coding region   |
| AlphaAR_Snow    | CTTCAGAACTCCAGGAATCAAATC      |                                                                               |
| S4AF_Snow       | GCCGCATCCTCCCGGAATGC          | BB_0615, rpsD, ribosomal protein S4, coding region                            |
| S4AR_Snow       | GTCTCCAGTAACACCGTGATC         |                                                                               |
| L17AF_Snow      | GGAAGTCTAGTCACAGGAGAGCGC      | BB_0503, rplQ, ribosomal protein L17, coding region                           |
| L17AR_Snow      | GCACAGTATCAACTTTTGCCC         |                                                                               |

Table S2. mRNA degradation following transcriptional arrest by removal of inducer or addition of actinomycin D. Ct values obtained in qRT-PCR trials. The experiment was performed with two biological samples (n=2; numbers 1 and 2) in duplicate (letters a and b).

| time (min)         | minus inducer |       |       |       | plus inducer, plus actinomycin D |         |       |       | plus inducer |       |       |       |
|--------------------|---------------|-------|-------|-------|----------------------------------|---------|-------|-------|--------------|-------|-------|-------|
|                    | 1a            | 1b    | 2a    | 2b    | 1a                               | 1b      | 2a    | 2b    | 1a           | 1b    | 2a    | 2b    |
| <b><i>rpoS</i></b> |               |       |       |       |                                  |         |       |       |              |       |       |       |
| 5                  | 21.08         | 20.1  | 21.13 | 20.52 | 21.33                            | 21.04   | 21.21 | 21.19 | 20.35        | 19.59 | 20.45 | 20.52 |
| 10                 | 22.19         | 21.89 | 21.15 | 21.62 | 21.69                            | 21.49   | 21.69 | 21.49 | 20.34        | 20.09 | 20.81 | 20.14 |
| 20                 | 21.92         | 22.2  | 22.26 | 21.27 | 22.5                             | 19.82   | 20.33 | 20.16 | 20.31        | 20.95 | 19.15 | 18.3  |
| 45                 | 23.23         | 22.92 | 22.18 | 21.74 | 21.45                            | 20.19   | 21.76 | 21.58 | 19.56        | 19.34 | 18.62 | 18.45 |
| 240                | 23.36         | 23.69 | 23.68 | 23.12 | 24.07                            | 23.61   | 22.98 | 22.7  | 18.94        | 18.36 | 19.87 | 19.75 |
| 1260               | 24.15         | 23.84 | 25.15 | 24.91 | 25.55                            | 25.75   | 27.15 | 26.89 | 19.67        | 19.98 | 19.37 | 19.66 |
| no template        | 37.8          | 36.51 | 36.53 | 36.28 |                                  |         |       |       |              |       |       |       |
| no RT              | no data       | 36.22 | 29.52 | 34.4  |                                  |         |       |       |              |       |       |       |
| <b><i>flaB</i></b> |               |       |       |       |                                  |         |       |       |              |       |       |       |
| 5                  | 10.82         | 10.66 | 11.07 | 10.5  | 10.79                            | 11.7    | 11.79 | 11.03 | 10.83        | 11.34 | 13.55 | 11.96 |
| 10                 | 11.56         | 11.54 | 10.97 | 10.82 | 10.33                            | 11.67   | 11.71 | 11.77 | 11.42        | 11.41 | 12.3  | 11.6  |
| 20                 | 10.86         | 11.88 | 10.79 | 10.34 | 10.46                            | 12.01   | 10.79 | 10.83 | 12.26        | 12.41 | 13.46 | 11.02 |
| 45                 | 11.54         | 11.38 | 10.75 | 10.44 | 10.59                            | no data | 11.38 | 10.74 | 10.91        | 11.17 | 11.91 | 10.75 |
| 240                | 11.25         | 11.07 | 10.71 | 10.36 | 13.43                            | 13.55   | 13.07 | 12.64 | 10.26        | 10.63 | 12.13 | 11.81 |
| 1260               | 12.94         | 13.49 | 10.75 | 10.35 | 14.94                            | 15.81   | 15.92 | 15.65 | 11.11        | 11.53 | 10.91 | 11.27 |
| no template        | 31.81         | 32.19 | 32.23 | 34.81 |                                  |         |       |       |              |       |       |       |
| no RT              | 31.12         | 29.75 | 31.29 | 32.83 |                                  |         |       |       |              |       |       |       |

Table S3 mRNA degradation following transcriptional arrest. Ct values obtained from qRT-PCR. The experiment was performed 3 times and most samples were tested in duplicate times with qRT-PCR.

| time (min)   | <i>rpoS</i> leader region |       |       |       |       |       | <i>rpoS</i> coding region |         |       |       |       |       |
|--------------|---------------------------|-------|-------|-------|-------|-------|---------------------------|---------|-------|-------|-------|-------|
|              | 1a                        | 1b    | 2a    | 2b    | 3a    | 3b    | 1a                        | 1b      | 2a    | 2b    | 3a    | 3b    |
| 0            | 17.76                     | 17.19 | 18.48 | 18.08 | 18.56 | 18.59 | 18.66                     | 19.49   | 19.08 | 19.06 | 19.80 | 19.90 |
| 2            | 19.96                     | 19.93 | 20.06 | 19.96 | 21.51 | 20.81 | 21.16                     | 21.68   | 20.51 | 20.69 | 21.58 | 21.93 |
| 10           | 20.51                     | 20.26 | 20.45 | 20.44 | 20.87 | 20.79 | 21.62                     | 21.73   | 21.00 | 21.34 | 21.87 | 22.31 |
| 45           | 20.53                     | 20.47 | 21.08 | 20.95 | 21.65 | 21.80 | 22.04                     | 22.54   | 21.68 | 21.85 | 22.26 | 22.95 |
| 120          | 21.08                     | 21.24 | 22.01 | 22.37 | 22.07 | 22.15 | 22.51                     | 23.32   | 22.41 | 22.61 | 22.57 | 23.00 |
| 240          | 21.80                     | 21.71 | 22.34 | 23.76 | 22.52 | 22.55 | 23.55                     | 23.95   | 23.20 | 23.04 | 22.61 | 23.47 |
| 1350         | 24.26                     | 24.17 | 24.21 | 24.52 | 24.70 | 24.64 | 25.99                     | 27.06   | 23.93 | 24.25 | 25.04 | 25.26 |
| 240 minus AD | 18.41                     | 18.28 | 18.70 | 18.94 | 18.50 | 18.51 | 19.31                     | 19.93   | 18.61 | 18.85 | 19.00 | 19.36 |
| No Template  | 29.39                     | 38.10 | 30.02 | 29.36 | 34.99 | 32.62 | 32.20                     | 35.30   | 30.69 | 35.09 | 37.03 | 30.67 |
| No RT        | 33.61                     | 31.77 | 34.29 | 29.66 | 34.00 | No Ct | 37.74                     | 33.49   | 43.87 | 30.36 | No Ct | No Ct |
|              | <i>ospA</i>               |       |       |       |       |       | <i>ospC</i>               |         |       |       |       |       |
|              | 1a                        | 1b    | 2a    | 2b    | 3a    | 3b    | 1a                        | 1b      | 2a    | 2b    | 3a    | 3b    |
| 0            | 11.34                     | 11.15 | 12.55 | 14.63 | 12.63 | 12.59 | 11.24                     | 11.32   | 9.34  | 9.25  | 9.86  | 9.9   |
| 2            | 11.61                     | 10.7  | 12.38 | 13.78 | 12.44 | 12.28 | 11.41                     | 11.47   | 9.19  | 9.26  | 9.33  | 9.45  |
| 10           | 11.68                     | 11.39 | 12.72 | 14.08 | 12.5  | 12.32 | 11.62                     | 11.04   | 9.18  | 9.11  | 9.26  | 9.41  |
| 45           | 12.71                     | 12.24 | 13.34 | 14.84 | 13.57 | 13.44 | 11.61                     | 11.34   | 9.19  | 9.47  | 9.69  | 9.43  |
| 120          | 14.64                     | 15.73 | 15.7  | 16.45 | 15.28 | 15.98 | 12.71                     | 12.67   | 10.55 | 10.82 | 10.56 | 10.65 |
| 240          | 15.63                     | 15.27 | 16.35 | 17.47 | 16.17 | 15.5  | 15.72                     | 15.42   | 12.23 | 12.33 | 13.36 | 12.66 |
| 1350         | 18.37                     | 18.1  | 17.48 | 18.78 | 18.33 | 17.71 | 18.69                     | 18.69   | 14.31 | 14.48 | 15.48 | 15.45 |
| 240 minus AD | 11.83                     | 11.73 | 12.33 | 13.6  | 12.84 | 12.55 | 11.51                     | 11.17   | 9.35  | 9.39  | 9.66  | 9.61  |
| No Template  | 36.47                     | 35.66 | 36.34 | 36.13 | 35.24 | 31.87 | 33.67                     | 39.92   | 28.72 | No Ct | 30.25 | 29.23 |
| No RT        | 35.62                     | 38.27 | 30.85 | 35.84 | 35.06 | No Ct | 35.62                     | 36.89   | 40.54 | 33.33 | 39.63 | No Ct |
|              | <i>rpsO</i> (S15)         |       |       |       |       |       | <i>pnpase</i>             |         |       |       |       |       |
|              | 1a                        | 1b    | 2a    | 2b    | 3a    | 3b    | 1a                        | 1b      | 2a    | 2b    | 3a    | 3b    |
| 0            | 13.99                     | 13.67 | 14.47 | 14.61 | 14.37 | 14.66 | 13.98                     | no data | 14.51 | 14.33 | 14.23 | 14.81 |
| 2            | 15.02                     | 14.54 | 15.23 | 15.02 | 15.47 | 15.64 | 15.01                     | no data | 14.98 | 14.82 | 15.34 | 15.76 |
| 10           | 15.63                     | 15.62 | 14.99 | 15.63 | 15.69 | 15.69 | 15.41                     | no data | 14.88 | 15.08 | 15.39 | 16.10 |
| 45           | 15.50                     | 15.50 | 15.87 | 16.19 | 16.04 | 16.05 | 15.80                     | no data | 15.26 | 15.28 | 15.92 | 15.97 |
| 120          | 16.66                     | 16.41 | 17.26 | 17.47 | 17.10 | 16.81 | 16.37                     | no data | 16.71 | 16.55 | 16.74 | 17.19 |
| 240          | 17.30                     | 17.30 | 17.86 | 17.86 | 17.80 | 17.17 | 17.36                     | no data | 17.43 | 17.28 | 17.39 | 17.50 |
| 1350         | 20.18                     | 20.32 | 19.53 | 19.29 | 19.61 | 19.52 | 20.28                     | no data | 19.11 | 18.89 | 19.59 | 19.24 |
| 240 minus AD | 14.25                     | 14.47 | 14.60 | 14.56 | 14.47 | 14.66 | 14.49                     | no data | 14.07 | 13.98 | 14.55 | 14.70 |
| No Template  | 35.79                     | 35.02 | 35.60 | 35.00 | 30.07 | 31.46 | 24.67                     | no data | 24.60 | 35.56 | 33.66 | 33.30 |
| No RT        | 35.03                     | 37.42 | 32.14 | 35.93 | 35.93 | 36.87 | 34.53                     | no data | 33.24 | 36.20 | 34.96 | 35.13 |
|              |                           |       |       |       |       |       |                           |         |       |       |       |       |

|              | <i>rpsO</i> / <i>pnpase</i> overlap region |       |       |       |       |       | <i>flaB</i> |       |       |       |       |       |
|--------------|--------------------------------------------|-------|-------|-------|-------|-------|-------------|-------|-------|-------|-------|-------|
|              | 1a                                         | 1b    | 2a    | 2b    | 3a    | 3b    | 1a          | 1b    | 2a    | 2b    | 3a    | 3b    |
| 0            | 14.44                                      | 14.59 | 14.96 | 13.85 | 15.15 | 15.42 | 10.33       | 10.27 | 10.11 | 10.08 | 10.88 | 10.83 |
| 2            | 15.50                                      | 14.84 | 15.37 | 14.10 | 16.22 | 16.21 | 10.36       | 10.28 | 9.81  | 9.95  | 10.50 | 10.33 |
| 10           | 16.29                                      | 15.79 | 15.77 | 14.43 | 16.22 | 16.23 | 10.51       | 10.06 | 9.87  | 9.87  | 10.51 | 10.42 |
| 45           | 15.91                                      | 16.49 | 16.05 | 14.57 | 16.56 | 16.65 | 10.36       | 10.28 | 9.78  | 9.80  | 10.57 | 10.23 |
| 120          | 17.05                                      | 16.68 | 17.64 | 16.16 | 17.36 | 17.28 | 11.48       | 11.45 | 11.46 | 11.67 | 11.94 | 11.81 |
| 240          | 17.91                                      | 17.60 | 18.20 | 16.50 | 18.11 | 17.98 | 12.88       | 12.56 | 12.88 | 13.09 | 13.41 | 13.56 |
| 1350         | 20.72                                      | 20.39 | 19.77 | 18.04 | 20.09 | 20.40 | 15.67       | 15.82 | 14.42 | 14.37 | 15.51 | 15.03 |
| 240 minus AD | 15.03                                      | 14.91 | 15.15 | 13.40 | 15.31 | 15.60 | 10.40       | 10.26 | 9.79  | 9.88  | 10.41 | 10.36 |
| No Template  | 37.35                                      | 38.52 | 37.38 | 36.08 | 33.42 | 37.37 | 30.04       | 33.00 | 24.91 | 34.60 | 34.55 | 25.96 |
| No RT        | 31.27                                      | 36.00 | 32.36 | No Ct | 36.77 | 36.77 | 31.82       | 34.03 | 33.43 | 30.83 | 35.03 | 33.83 |

Figure S1: Fraction of mRNA remaining after transcriptional arrest at 22 °C.

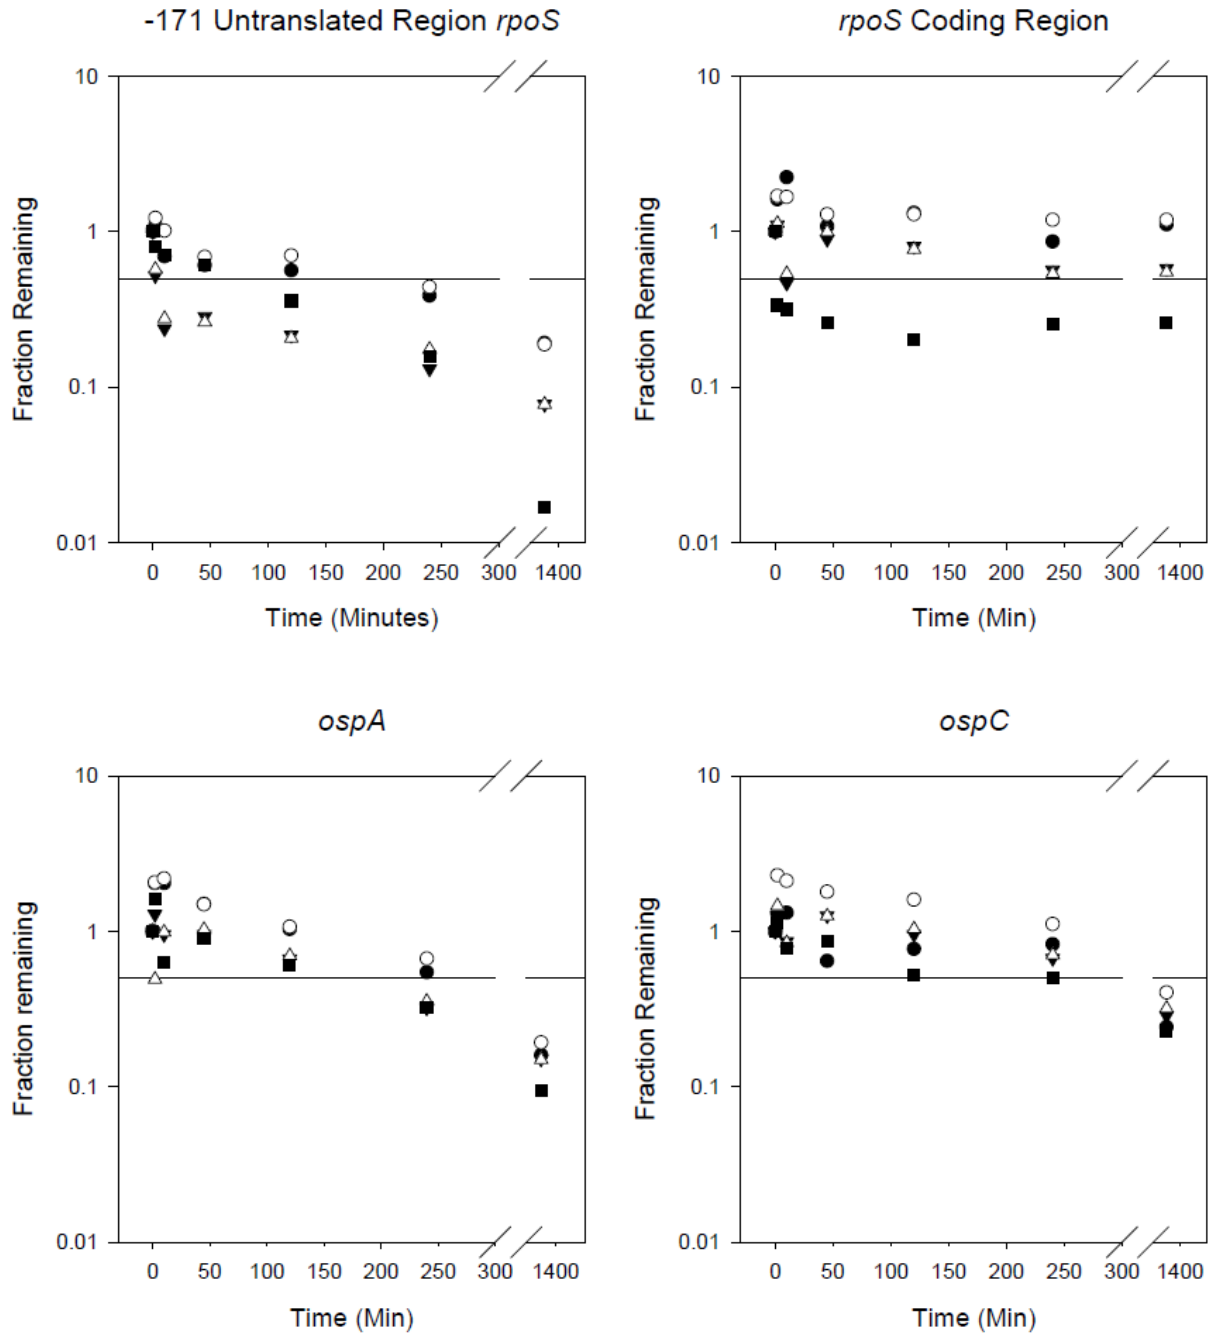

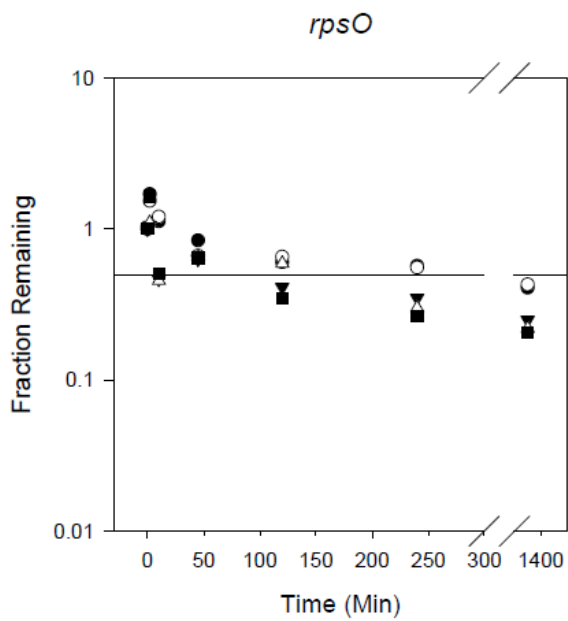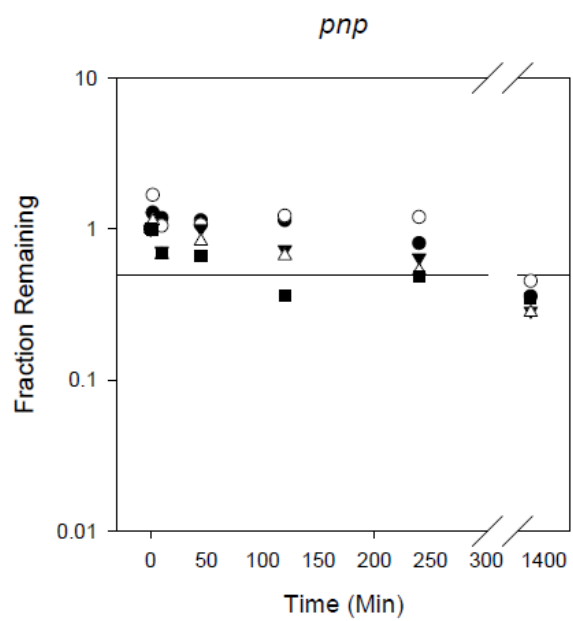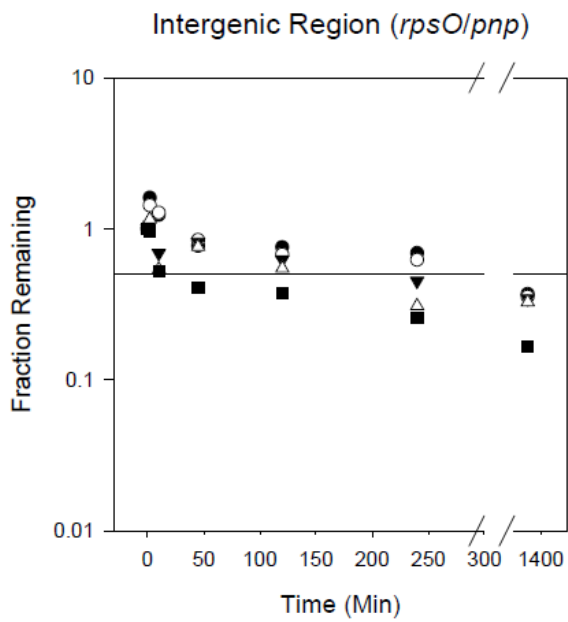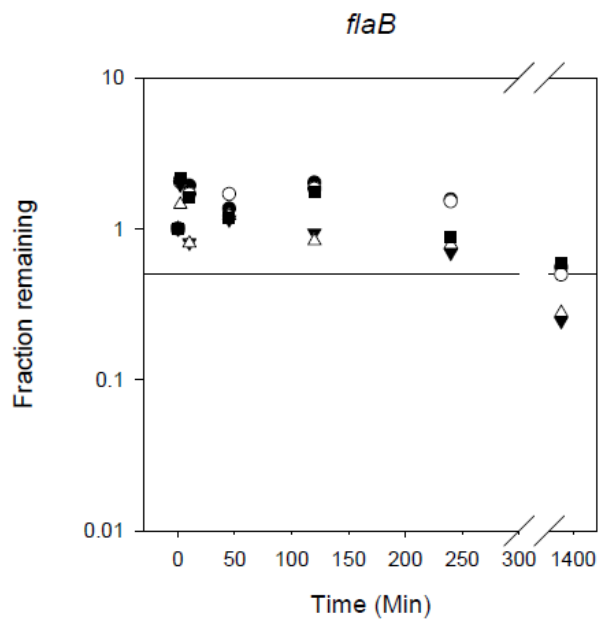

Supplement: JB.00659-13_zjb999092861so1.pdf [file JB.00659-13_zjb999092861so1.pdf]
